# Supplementary material for: Qualitative views of Nigerian school principals and teachers on the barriers and opportunities for promoting students’ physical activity behaviours within the school settings
Source: Springer Nature journal article supplement (doi:10.1186/s12889-021-12327-x), 2021-12-01
Supplement: MOESM3 [file 19968012]

## FOCUS GROUP DISCUSSION GUIDE FOR SUBJECT/CLASS TEACHERS

|    | Question                                                                                      | Probes                                                                                                                                                                                                                                                                                                                                                                                                                                                                                                                             |
|----|-----------------------------------------------------------------------------------------------|------------------------------------------------------------------------------------------------------------------------------------------------------------------------------------------------------------------------------------------------------------------------------------------------------------------------------------------------------------------------------------------------------------------------------------------------------------------------------------------------------------------------------------|
| 1. | Health of in-school adolescents                                                               | <p><i>Probe for</i></p> <p><i>Common diseases</i></p> <p><i>Health behaviours specifically physical activity</i></p>                                                                                                                                                                                                                                                                                                                                                                                                               |
| 2. | Level of physical activity among students                                                     | <p>Probe if</p> <p>High or Low based on age (i.e. 10-14 and 15-19) and gender (i.e. males or females)</p> <p>In-school adolescents attain the recommended daily target of 60 minutes of Moderate to Vigorous Physical activity</p>                                                                                                                                                                                                                                                                                                 |
| 3. | Opportunities that students have to engage in physical activity during school                 | <p>Probe for</p> <p>Frequency and opportunities for engagement in structured physical activity (i.e. <i>sports, class based activities, regular school physical activity programmes</i>)</p> <p>Frequency and opportunities for unstructured activities (i.e. <i>break time, after school programmes etc</i>)</p> <p>Type of PAs students engage in' Probe for those liked /those not liked</p> <p>What students consider as appropriate/inappropriate PAs"</p> <p>Use of physical activity as a form of corporal punishment</p>   |
| 4. | Factors promoting or hindering physical activity behaviours of adolescents in school settings | <p>Probe for</p> <p>Secondary school students thoughts about physical exercise in schools'</p> <p>Social norms including the attitude parents, teachers and school authorities</p> <p>Cultural factors especially gender issues</p> <p>Religious factors</p> <p>Physical/built environment,</p> <p>Availability of equipment and facilities</p> <p>Policies on physical activity in school specifically the <i>School Health policy, School Time table reflecting the break time, Curriculum for Physical Health Education</i></p> |

|    |                                                                                                                                                                  |                                                                                                                                                   |
|----|------------------------------------------------------------------------------------------------------------------------------------------------------------------|---------------------------------------------------------------------------------------------------------------------------------------------------|
|    |                                                                                                                                                                  | Role of government, teachers, parents, community, others'                                                                                         |
| 5. | Recommended activities which have the potentials of ensuring in-school adolescents attain the daily target of 60 minutes of moderate and vigorous daily activity | Probe for the appropriate interventions/activities to improve physical activity in schools<br><br>Probe for the most appropriate time and setting |
| 6. | Recommended actions to facilitate physical activity in the schools                                                                                               |                                                                                                                                                   |
